# Supplementary material for: Carboxylate-intercalated layered double hydroxides for H2 sorption
Source: Royal Society of Chemistry journal article supplement (doi:10.1039/c4ta01796j), 2014-01-01
Supplement: c4ta01796j1.pdf [file c4ta01796j1.pdf]

**Carboxylate- Intercalated Layered Double Hydroxides for H<sub>2</sub> Sorption**

*Yu-Wei Huang and Soofin Cheng\**

Department of Chemistry, National Taiwan University, No. 1, Sec. 4, Roosevelt Road, Taipei,  
10617, Taiwan

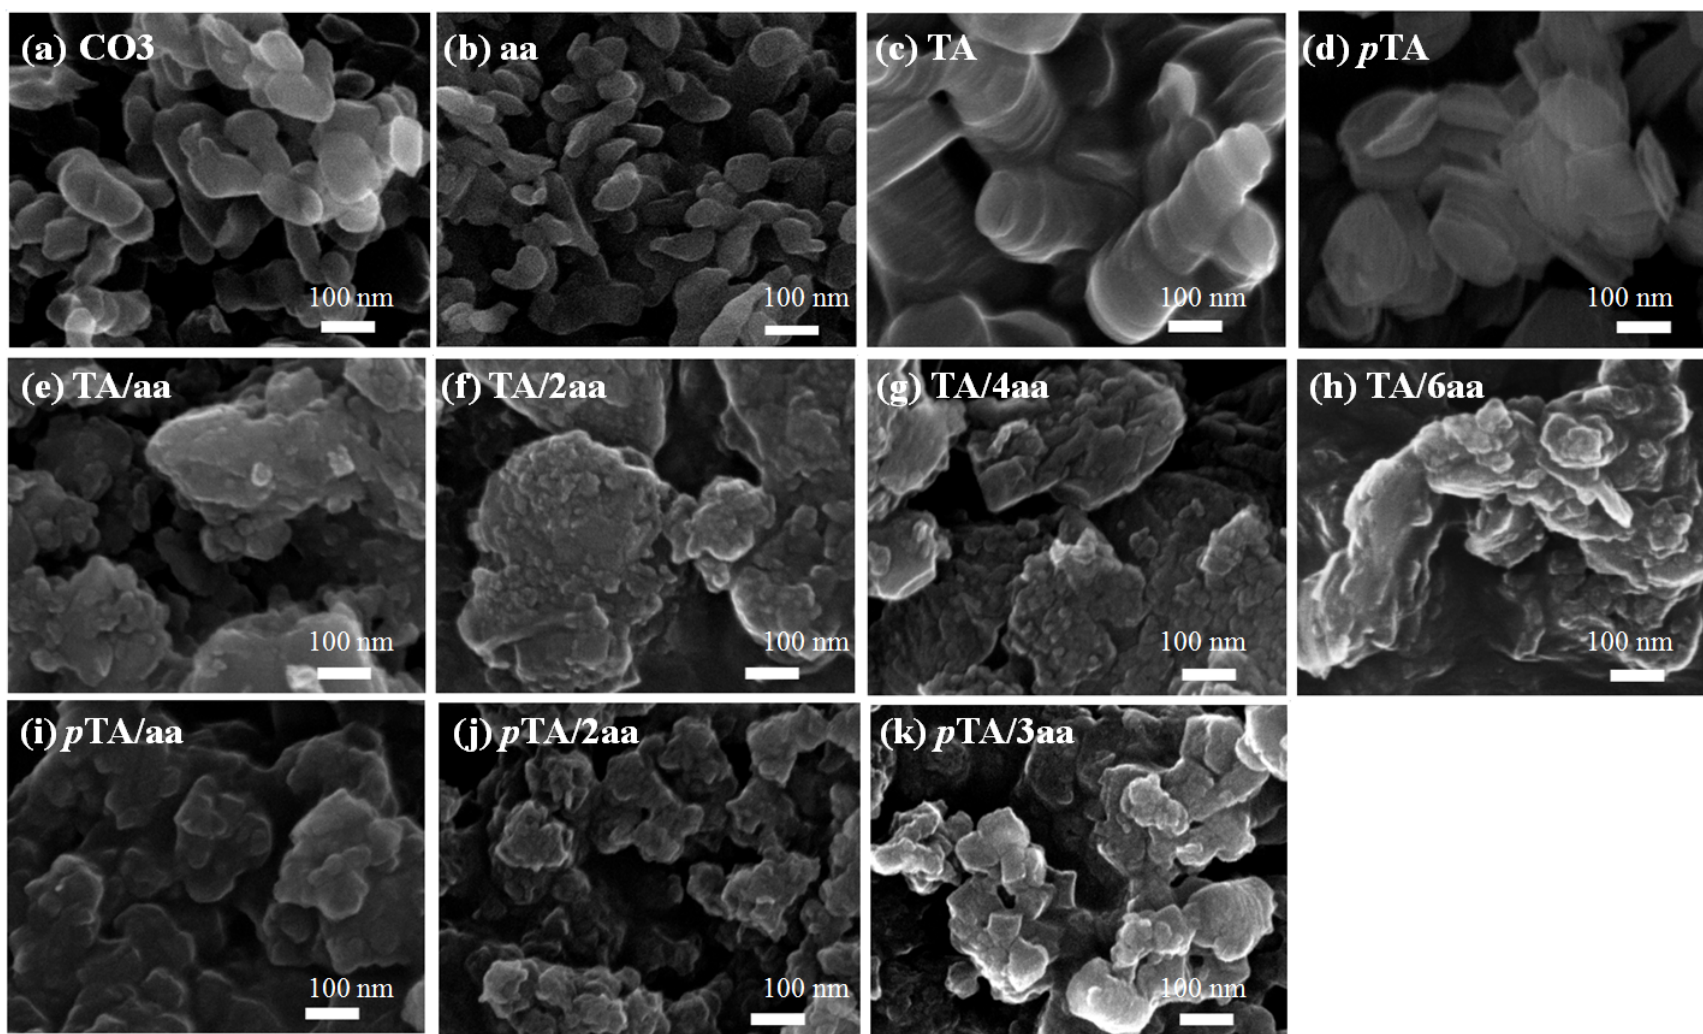

Figure S1. SEM micrographs of LDHs with different anions (a) CO<sub>3</sub>, (b) aa, (c) TA, (d) pTA, (e) TA/aa, (f) TA/2aa, (g) TA/4aa, (h) TA/6aa, (i) pTA/aa, (j) pTA/2aa, and (k) pTA/3aa.

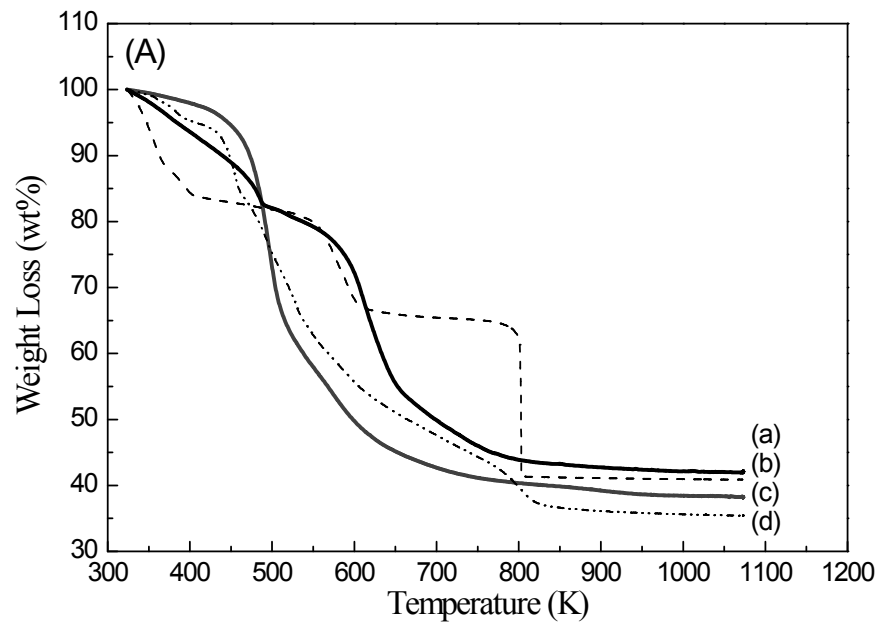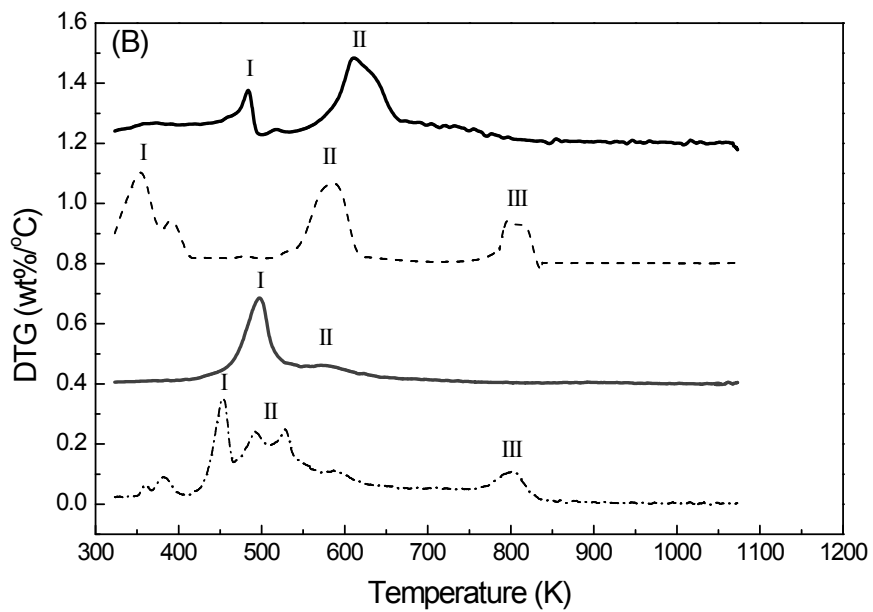

Figure S2. (A) TGA and (B) DTG profiles of LiAl-LDHs with different interlayer anions (a)  $\text{aa}^-$  (b)  $\text{TA}^{2-}$  (c)  $\text{CO}_3^{2-}$ , and (d)  $p\text{TA}^-$ .

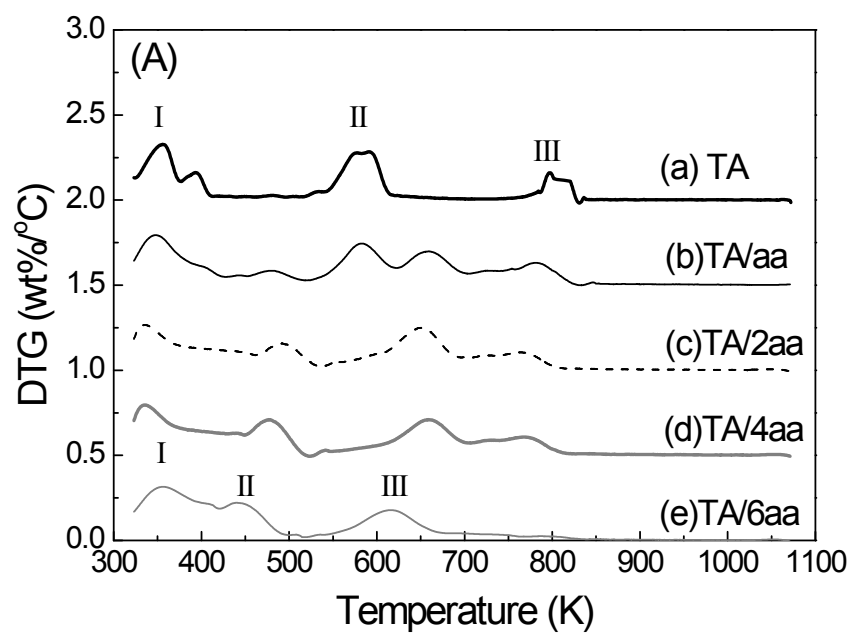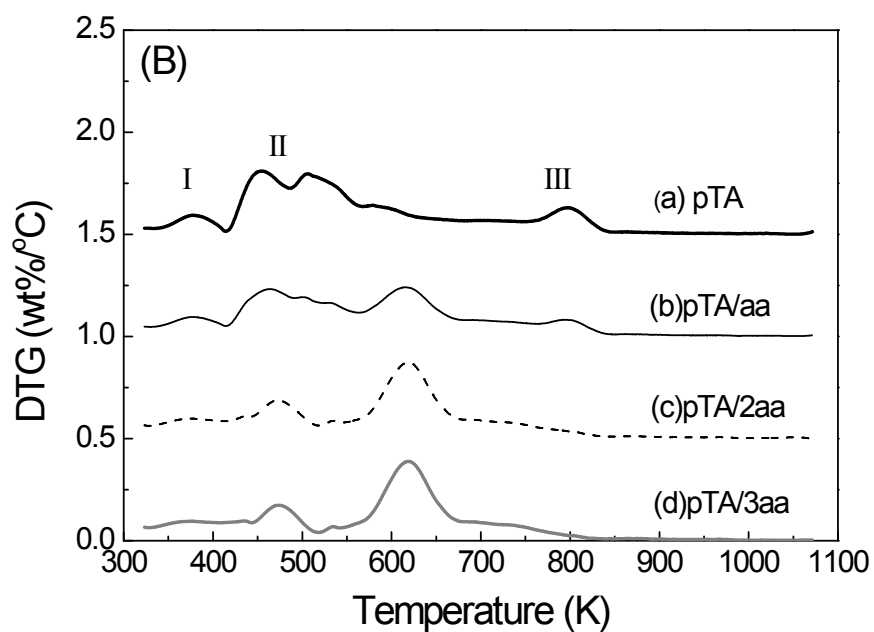

Figure S3. DTG profiles of LiAl- LDHs with mixed acetate and arylate anions (A) TA/naa

and (B) pTA/naa.

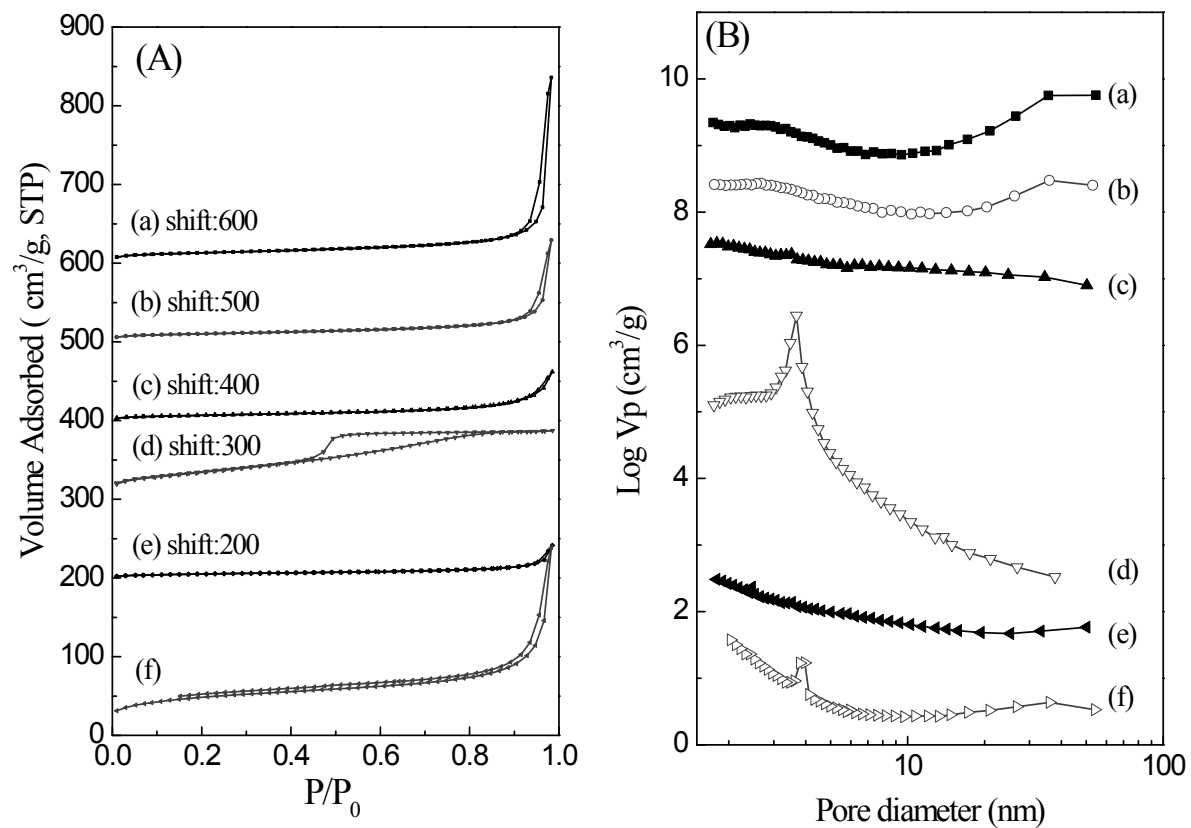

Figure S4. (A) N<sub>2</sub> adsorption-desorption isotherms and (B) BJH desorption pore size distribution of LiAl-LDHs with different interlayer anions:

(a) CO<sub>3</sub>, (b) aa, (c) TA, (d) TA/4aa, (e) *p*TA, and (f) *p*TA/3aa.

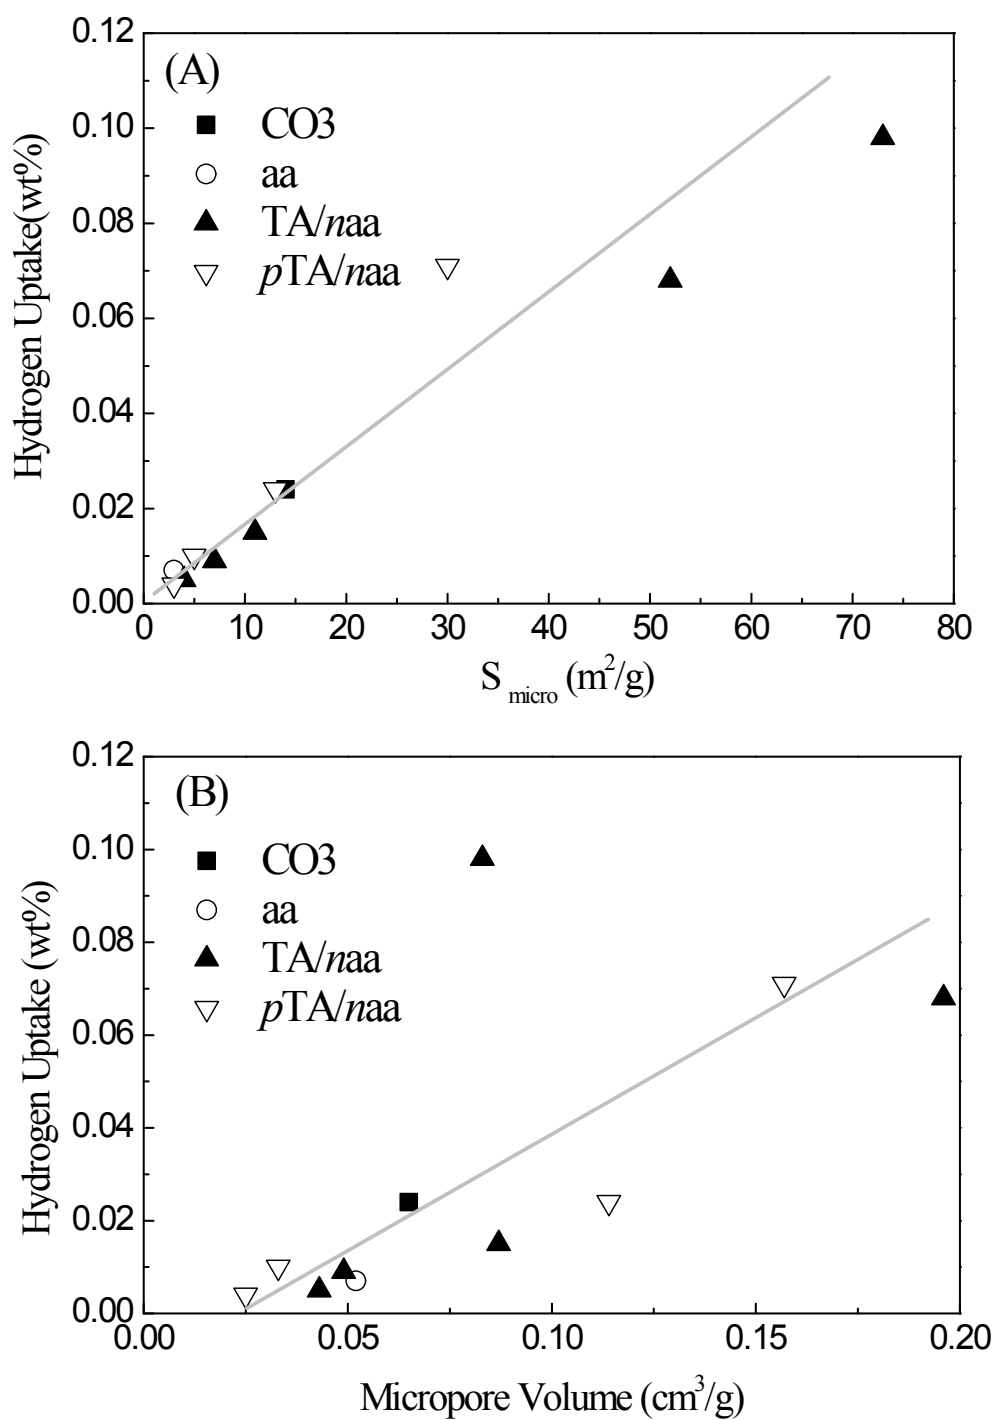

Figure S5. Relationship between the hydrogen uptake at 298K /100 atm and (A) microporous surface area, (B) micropore volume of LDHs with different interlayer anions.
